# Supplementary material for: Nickel-catalysed cyclopropanation of electron-deficient alkenes with diiodomethane and diethylzinc
Source: Royal Society of Chemistry journal article supplement (doi:10.1039/c5cc10296k), 2016-01-01
Supplement: c5cc10296k1.pdf [file c5cc10296k1.pdf]

## Supporting Information

**General information.** All reactions were carried out under a nitrogen atmosphere with dry solvents under anhydrous conditions, unless otherwise noted. THF was dried over alumina under N<sub>2</sub> using a Grubbs-type solvent purification system. All  $\alpha,\beta$ -unsaturated carbonyls were prepared according to the literature procedures. Yields refer to chromatographically and spectroscopically (<sup>1</sup>H NMR) homogeneous materials, unless otherwise stated. Reactions were monitored by Agilent GC Series 6890N and GCMS 7890A. Merck silica gel plates (60F-254) using UV light as visualizing agent. E. Merck silica gel (60, particle size 0.040–0.063 mm) was used for flash column chromatography. NMR spectra were recorded on Bruker DRX-400 calibrated using residual deuterated solvent (CDCl<sub>3</sub>:  $\delta$ H = 7.26 ppm,  $\delta$ C = 77.10 ppm) as an internal reference. The following abbreviations were used to designate the multiplicities: s = singlet, d = doublet, t = triplet, q = quartet, quin = quintet, m = multiplet, br = broad. Infrared (IR) spectra were recorded on a Perkin–Elmer Spectrum 100 FT-IR spectrometer. High resolution mass spectra (HRMS) were recorded on an Agilent 6210 Series 1969A ESI-TOF (time of flight) mass spectrometer using EI (electron ionization) or ESI (electrospray ionization).

### Optimizations for the Nickel-Catalysed Cyclopropanation of Chalcone 1a:

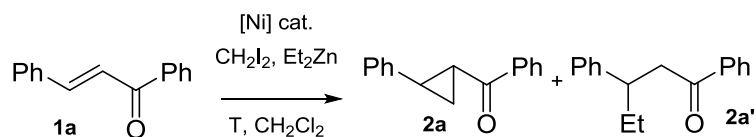

| Entry           | Ni catalyst (20 mol%) | CH <sub>2</sub> I <sub>2</sub> (equiv.) | Et <sub>2</sub> Zn (equiv.) | Ligand                                | Solvent           | T (°C) | Conv. (%) <sup>b</sup> | 2a (%) <sup>b</sup>  |
|-----------------|-----------------------|-----------------------------------------|-----------------------------|---------------------------------------|-------------------|--------|------------------------|----------------------|
| 1               | None                  | 4                                       | 2                           | none                                  | DCM               | 0      | 25                     | 7                    |
| 2               | NiCl <sub>2</sub>     | 4                                       | 2                           | none                                  | DCM               | 0      | 79                     | 58                   |
| 3               | NiCl <sub>2</sub>     | 4                                       | 2                           | none                                  | DCE               | 0      | 84                     | 57                   |
| 4               | NiCl <sub>2</sub>     | 4                                       | 2                           | none                                  | PhMe              | 0      | 61                     | 34                   |
| 5               | NiCl <sub>2</sub>     | 4                                       | 2                           | none                                  | THF               | 0      | 93                     | 25                   |
| 6               | NiCl <sub>2</sub>     | 4                                       | 2                           | none                                  | Et <sub>2</sub> O | 0      | >99                    | 8                    |
| 7               | NiCl <sub>2</sub>     | 4                                       | 2                           | 20 mol% Bipy <sup>b</sup>             | DCM               | 0      | 88                     | 32                   |
| 8               | NiCl <sub>2</sub>     | 4                                       | 2                           | 20 mol% PPh <sub>3</sub> <sup>b</sup> | DCM               | 0      | 79                     | 26                   |
| 9               | NiCl <sub>2</sub>     | 4                                       | 2                           | 20 mol% Dppf <sup>b</sup>             | DCM               | 0      | 92                     | 63                   |
| 10              | NiCl <sub>2</sub>     | 4                                       | 2                           | none                                  | DCM               | rt     | 84                     | 71                   |
| 11              | NiCl <sub>2</sub>     | 4                                       | 2                           | none                                  | DCM               | 40     | >99                    | 96                   |
| 12              | NiBr <sub>2</sub>     | 4                                       | 2                           | none                                  | DCM               | 40     | >99                    | 96                   |
| 13              | NiI <sub>2</sub>      | 4                                       | 2                           | none                                  | DCM               | 40     | >99                    | 97                   |
| 14              | Ni(acac) <sub>2</sub> | 4                                       | 2                           | none                                  | DCM               | 40     | >99                    | 41 (27) <sup>d</sup> |
| 15              | Ni(COD) <sub>2</sub>  | 4                                       | 2                           | none                                  | DCM               | 40     | 67                     | 41                   |
| 16 <sup>c</sup> | NiCl <sub>2</sub>     | 4                                       | 2                           | none                                  | DCM               | 40     | 100                    | 0 (98) <sup>d</sup>  |
| 17              | NiCl <sub>2</sub>     | 4                                       | 1.2                         | none                                  | DCM               | 40     | 56                     | 38                   |
| 18              | NiCl <sub>2</sub>     | 2                                       | 2                           | none                                  | DCM               | 40     | 91                     | 71 (9) <sup>d</sup>  |
| 19 <sup>e</sup> | NiCl <sub>2</sub>     | 4                                       | 2                           | none                                  | DCM               | 40     | 94                     | 94                   |
| 20 <sup>f</sup> | NiCl <sub>2</sub>     | 4                                       | 2                           | none                                  | DCM               | 40     | 98                     | 96                   |
| 21              | none                  | 4                                       | 2                           | none                                  | DCM               | 40     | 30                     | 7                    |

<sup>a</sup> A solution of Et<sub>2</sub>Zn in hexane was added slowly to a mixture of 1a, and Ni catalyst in CH<sub>2</sub>Cl<sub>2</sub>. <sup>b</sup> Determined by GC analysis using dodecane as an internal standard. <sup>c</sup> CH<sub>2</sub>Br<sub>2</sub> was used instead of CH<sub>2</sub>I<sub>2</sub>. <sup>d</sup> Yield of 2a'. <sup>e</sup> 10 mol% NiCl<sub>2</sub> was employed. <sup>f</sup> 2 mol% NiCl<sub>2</sub> was employed.

### General Procedure A for Ni-catalysed Cyclopropanation of Ketones:

To a mixture of 1.3 mg NiCl<sub>2</sub> (0.01 mmol, 2 mol%), 536 mg CH<sub>2</sub>I<sub>2</sub> (2 mmol, 4 equiv.) and 104 mg chalcone **1a** (0.5 mmol) in 2 mL DCM at 40 °C was added slowly 1 mL solution of Et<sub>2</sub>Zn in hexane (1M, 1 mmol, 2 equiv.) over 20 min under nitrogen. After the addition, the reaction was stirred for a further 10 min before diluted with EtOAc and quenched with saturated aqueous NH<sub>4</sub>Cl solution. Purification by silica gel column chromatography afforded the pure cyclopropane product.

### Phenyl(2-phenylcyclopropyl)methanone<sup>1</sup>

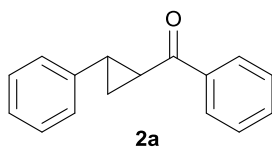

Purification by silica gel column chromatography (2-5% Et<sub>2</sub>O/petroleum ether) afforded **2a** as a white solid (96 mg, 86%). <sup>1</sup>H NMR (400 MHz, CDCl<sub>3</sub>) δ 7.99 (dd, *J* = 8.2, 1.3 Hz, 2H), 7.59 – 7.53 (m, 1H), 7.46 (s, 2H), 7.35 – 7.29 (m, 2H), 7.27 – 7.17 (m, 3H), 2.93 – 2.88 (m, 1H), 2.74 – 2.68 (m, 1H), 1.96 – 1.90 (m, 1H), 1.59 – 1.53 (m, 1H). <sup>13</sup>C NMR (100 MHz, CDCl<sub>3</sub>) δ 198.5, 140.5, 137.8, 132.9, 128.5 (4C), 128.1 (2C), 126.6, 126.2 (2C), 30.0, 29.3, 19.2.

### (2-(4-Methoxyphenyl)cyclopropyl)(phenyl)methanone<sup>2</sup>

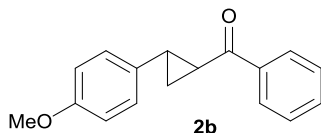

A similar procedure was used for 119 mg **1b** (0.5 mmol), 1.3 mg NiCl<sub>2</sub> (0.01 mmol, 2 mol%), 536 mg CH<sub>2</sub>I<sub>2</sub> (2 mmol, 4 equiv.), 2 mL DCM at 40 °C and 1.5 mL solution Et<sub>2</sub>Zn in hexane (1 M, 1.5 mmol, 3 equiv., added over 30 min). Purification by silica gel column chromatography (5-10% Et<sub>2</sub>O/petroleum ether) afforded **2b** as a white solid (93 mg, 74%). <sup>1</sup>H NMR (400 MHz, Acetone-*d*<sub>6</sub>) δ 8.05 (dd, *J* = 8.5, 1.7 Hz, 2H), 7.64 – 7.59 (m, 1H), 7.54 – 7.49 (m, 2H), 7.19 (d, *J* = 8.8 Hz, 2H), 6.87 (d, *J* = 8.8 Hz, 2H), 3.78 (s, 3H), 3.03 (ddd, *J* = 26.4, 4.1, 2.8 Hz, 1H), 2.55 (ddd, *J* = 8.9, 6.6, 4.0 Hz, 1H), 1.78 – 1.72 (m, 1H), 1.52 (dd, *J* = 3.8, 1.5 Hz, 1H). <sup>13</sup>C NMR (100 MHz, Acetone-*d*<sub>6</sub>) δ 197.4, 158.6, 137.8, 132.7, 132.4, 128.6 (2C), 127.9 (2C), 127.3 (2C), 113.9 (2C), 54.6, 28.9, 28.4, 18.3.

### Methyl 4-(2-benzoylcyclopropyl)benzoate

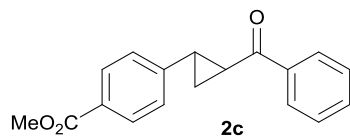

A similar procedure was used for 133 mg **1c** (0.5 mmol), 1.3 mg NiCl<sub>2</sub> (0.01 mmol, 2 mol%), 536 mg CH<sub>2</sub>I<sub>2</sub> (2 mmol, 4 equiv.), 2 mL DCM at 40 °C and 1 mL solution Et<sub>2</sub>Zn in hexane (1 M, 1 mmol, 2 equiv., added over 20 min). Purification by silica gel column chromatography (10% Et<sub>2</sub>O/petroleum ether) afforded **2c** as a white solid (117 mg, 84%). <sup>1</sup>H NMR (400 MHz, CDCl<sub>3</sub>) δ 8.01 – 7.96 (m, 4H), 7.60 – 7.54 (m, 1H), 7.47 (t, *J* = 8.0 Hz, 2H), 7.23 (d, *J* = 8.2 Hz, 2H), 3.91 (s, 3H), 2.98 – 2.92 (m, 1H), 2.77 – 2.71 (m, 1H), 2.00 – 1.94 (m, 1H), 1.62 – 1.56 (m, 1H). <sup>13</sup>C NMR (100 MHz, CDCl<sub>3</sub>) δ 198.0, 166.8, 146.0, 137.5, 133.1, 129.9 (2C), 128.6 (2C), 128.5, 128.1 (2C), 126.0 (2C), 52.0, 29.6, 29.5, 19.6. IR (neat, cm<sup>-1</sup>) 2955 (w), 2927 (w), 1715 (s), 1708 (s), 1658 (m), 1439 (w), 1277 (s), 1226 (m), 1114 (m), 987 (w), 765 (m), 704 (s). HRMS (ESI-TOF) *m/z*: calc. for C<sub>18</sub>H<sub>16</sub>O<sub>3</sub>Na [M+Na]<sup>+</sup>: 303.0987, found 303.0992.

### (4-Bromophenyl)(2-phenylcyclopropyl)methanone<sup>3</sup>

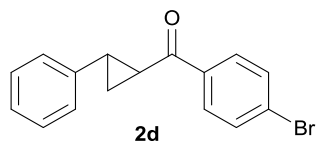

A similar procedure was used for 144 mg **1d** (0.5 mmol), 1.3 mg NiCl<sub>2</sub> (0.01 mmol, 2 mol%), 536 mg CH<sub>2</sub>I<sub>2</sub> (2 mmol, 4 equiv.), 2 mL DCM at 40 °C and 1 mL solution Et<sub>2</sub>Zn in hexane (1 M, 1 mmol, 2 equiv., added over 20 min). Purification by silica gel column chromatography (0-15% Et<sub>2</sub>O/petroleum ether) afforded **2d** as a white solid (116 mg, 77%). <sup>1</sup>H NMR (400 MHz, CDCl<sub>3</sub>) δ 7.86 (d, *J* = 8.7 Hz, 2H), 7.60 (d, *J* = 8.7 Hz, 2H), 7.35 – 7.29 (m, 2H), 7.25 (d, *J* = 7.2 Hz, 1H), 7.20 – 7.16 (m, 2H), 2.86 – 2.80 (m, 1H), 2.71 (ddd, *J* = 9.1, 6.6, 4.0 Hz, 1H), 1.96 – 1.90 (m, 1H), 1.61 – 1.55 (m, 1H). <sup>13</sup>C NMR (100 MHz, CDCl<sub>3</sub>) δ 197.4, 140.2, 136.5, 131.9, 129.6 (2C), 128.6 (2C), 128.1 (2C), 126.7, 126.2 (2C), 30.2, 29.2, 19.3.

### (4-Methoxyphenyl)(2-phenylcyclopropyl)methanone<sup>4</sup>

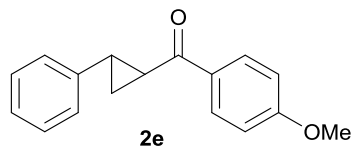

A similar procedure was used for 60 mg **1e** (0.25 mmol), 6.5 mg NiCl<sub>2</sub> (0.05 mmol, 20 mol%), 268 mg CH<sub>2</sub>I<sub>2</sub> (1 mmol, 4 equiv), 1 mL DCM at 40 °C and 0.5 mL solution Et<sub>2</sub>Zn in hexane (1 M, 0.5 mmol, 2 equiv., added over 10 min). Purification by silica gel column chromatography (5% Et<sub>2</sub>O/petroleum ether) afforded **2e** as a white solid (47 mg, 74%). <sup>1</sup>H NMR (400 MHz, CDCl<sub>3</sub>) δ 7.99 (d, *J* = 8.9 Hz, 2H), 7.34 – 7.28 (m, 2H), 7.25 – 7.16 (m, 3H), 6.94 (d, *J* = 8.9 Hz, 2H), 3.87 (s, 3H), 2.88 – 2.82 (m, 1H), 2.71 – 2.64 (m, 1H), 1.92 – 1.86 (m, 1H), 1.54 – 1.48 (m, 1H). <sup>13</sup>C NMR (100 MHz, CDCl<sub>3</sub>) δ 196.9, 163.4, 140.7, 130.8, 130.3 (2C), 128.5 (2C), 126.5, 126.2 (2C), 113.7 (2C), 55.5, 29.4, 28.8, 18.8.

### 1-(2-Phenylcyclopropyl)ethan-1-one<sup>5</sup>

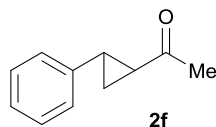

A similar procedure was used for 74 mg **1f** (0.5 mmol), 6.5 mg NiCl<sub>2</sub> (0.05 mmol, 10 mol%), 536 mg CH<sub>2</sub>I<sub>2</sub> (2 mmol, 4 equiv.), 2 mL DCM at 40 °C and 1 mL solution Et<sub>2</sub>Zn in hexane (1 M, 1 mmol, 2 equiv., added over 20 min). Purification by silica gel column chromatography (0-10% Et<sub>2</sub>O/petroleum ether) afforded **2f** as a colourless gum (49 mg, 61%). <sup>1</sup>H NMR (400 MHz, CDCl<sub>3</sub>) δ 7.31 – 7.25 (m, 3H), 7.21 (d, *J* = 7.4 Hz, 1H), 7.12 – 7.07 (m, 2H), 2.56 – 2.49 (m, 1H), 2.30 (s, 3H), 2.24 – 2.18 (m, 1H), 1.70 – 1.64 (m, 1H), 1.41 – 1.34 (m, 1H). <sup>13</sup>C NMR (100 MHz, CDCl<sub>3</sub>) δ 206.7, 140.3, 128.5 (2C), 126.5, 126.0 (2C), 32.8, 30.8, 29.0, 19.0.

### 1-(2-Pentylcyclopropyl)ethan-1-one

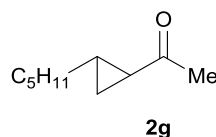

A similar procedure was used for 70 mg **1g** (0.5 mmol), 1.3 mg NiCl<sub>2</sub> (0.01 mmol, 2 mol%), 536 mg CH<sub>2</sub>I<sub>2</sub> (2 mmol, 4 equiv.), 2 mL DCM at 40 °C and 1 mL solution Et<sub>2</sub>Zn in hexane (1 M, 1 mmol, 2 equiv., added over 20 min). Purification by silica gel column chromatography (0-5%

Et<sub>2</sub>O/petroleum ether) afforded **2g** as a colourless oil (39 mg, 51%). <sup>1</sup>H NMR (400 MHz, CDCl<sub>3</sub>) δ 2.21 (s, 3H), 1.68 (dt, *J* = 8.1, 4.1 Hz, 1H), 1.45 – 1.17 (m, 10H), 0.88 (d, *J* = 7.5 Hz, 3H), 0.73 (ddd, *J* = 7.9, 6.3, 3.7 Hz, 1H). <sup>13</sup>C NMR (100 MHz, CDCl<sub>3</sub>) δ 208.3, 33.2, 31.5, 30.1, 29.3, 28.8, 26.0, 22.6, 18.0, 14.0. IR (neat, cm<sup>-1</sup>) 2960 (m), 2929 (s), 2858 (m), 1700 (s), 1402 (m), 1358 (m), 1173 (s), 1025 (w), 960 (w), 861 (w). HRMS (ESI-TOF) *m/z*: calc. for C<sub>10</sub>H<sub>19</sub>O [M+H]<sup>+</sup>: 155.1430, found 155.1428.

### (2-Methylcyclopropyl)(phenyl)methanone<sup>6</sup>

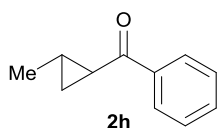

A similar procedure was used for 74 mg **1h** (0.5 mmol), 1.3 mg NiCl<sub>2</sub> (0.01 mmol, 2 mol%), 536 mg CH<sub>2</sub>I<sub>2</sub> (2 mmol, 4 equiv.), 2 mL DCM at 40 °C and 1 mL solution Et<sub>2</sub>Zn in hexane (1 M, 1 mmol, 2 equiv., added over 20 min). Purification by silica gel column chromatography (20-40% DCM/petroleum ether) afforded **2h** as a colourless oil (52 mg, 65%). <sup>1</sup>H NMR (400 MHz, CDCl<sub>3</sub>) δ 7.92 (d, *J* = 8.0 Hz, 2H), 7.51 – 7.45 (m, 1H), 7.41 (t, *J* = 7.7 Hz, 2H), 2.35 – 2.29 (m, 1H), 1.58 – 1.49 (m, 2H), 1.45 – 1.39 (m, 1H), 1.16 (d, *J* = 6.3 Hz, 3H), 0.85 – 0.78 (m, 1H). <sup>13</sup>C NMR (100 MHz, CDCl<sub>3</sub>) δ 199.0, 137.2, 131.5, 127.4 (2C), 126.9 (2C), 25.4, 20.2, 19.1, 17.3.

### Cyclopropyl(phenyl)methanone<sup>7</sup>

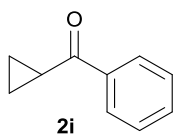

A similar procedure was used for 66 mg **1i** (0.5 mmol), 1.3 mg NiCl<sub>2</sub> (0.01 mmol, 2 mol%), 536 mg CH<sub>2</sub>I<sub>2</sub> (2 mmol, 4 equiv.), 2 mL DCM at 40 °C and 1 mL solution Et<sub>2</sub>Zn in hexane (1 M, 1 mmol, 2 equiv., added over 20 min). Purification by silica gel column chromatography (1% Et<sub>2</sub>O/pentane) afforded **2i** as a colourless oil (39 mg, 53%). <sup>1</sup>H NMR (400 MHz, CDCl<sub>3</sub>) δ 7.95 (d, *J* = 7.3 Hz, 2H), 7.53 – 7.47 (m, 1H), 7.41 (dd, *J* = 8.0, 7.3 Hz, 2H), 2.65 – 2.57 (m, 1H), 1.21 – 1.16 (m, 2H), 1.01 – 0.94 (m, 2H). <sup>13</sup>C NMR (100 MHz, CDCl<sub>3</sub>) δ 200.6, 138.1, 132.7, 128.5 (2C), 128.0 (2C), 17.1, 11.6 (2C).

### (1-Methylcyclopropyl)(phenyl)methanone<sup>5b</sup>

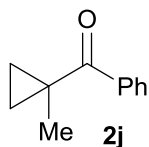

A similar procedure was used for 74 mg **1j** (0.5 mmol), 1.3 mg NiCl<sub>2</sub> (0.01 mmol, 2 mol%), 536 mg CH<sub>2</sub>I<sub>2</sub> (2 mmol, 4 equiv.), 2 mL DCM at 40 °C and 1 mL solution Et<sub>2</sub>Zn in hexane (1 M, 1 mmol, 2 equiv., added over 20 min). Purification by silica gel column chromatography (1% Et<sub>2</sub>O/pentane) afforded **2j** as a colourless oil (48 mg, 59%). <sup>1</sup>H NMR (400 MHz, CDCl<sub>3</sub>) δ 7.81 – 7.77 (m, 2H), 7.52 – 7.47 (m, 1H), 7.46 – 7.40 (m, 2H), 1.44 (s, 3H), 1.28 (dd, *J* = 6.5, 4.0 Hz, 2H), 0.79 (dd, *J* = 6.5, 4.0 Hz, 2H). <sup>13</sup>C NMR (100 MHz, CDCl<sub>3</sub>) δ 204.3, 137.7, 131.6 (2C), 128.2 (3C), 128.2, 25.5, 21.9, 15.2 (2C).

### Bicyclo[4.1.0]heptan-2-one<sup>8</sup>

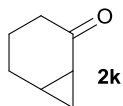

A similar procedure was used for 48 mg **1j** (0.5 mmol), 1.3 mg NiCl<sub>2</sub> (0.01 mmol, 2 mol%), 536 mg CH<sub>2</sub>I<sub>2</sub> (2 mmol, 4 equiv.), 2 mL DCM at 40 °C and 1 mL solution Et<sub>2</sub>Zn in hexane (1 M, 1 mmol, 2 equiv., added over 20 min). Purification by silica gel column chromatography (10-15% Et<sub>2</sub>O/petroleum ether) afforded **2k** as a colourless oil (24 mg, 44%). <sup>1</sup>H NMR (400 MHz, CDCl<sub>3</sub>) δ 2.33 – 2.23 (m, 1H), 2.11 – 1.85 (m, 3H), 1.79 – 1.55 (m, 4H), 1.25 – 1.15 (m, 1H), 1.12 – 1.04 (m, 1H). <sup>13</sup>C NMR (100 MHz, CDCl<sub>3</sub>) δ 209.2, 36.7, 25.8, 21.3, 17.8, 17.4, 10.2.

### General Procedure A for Ni-catalysed Cyclopropanation of Esters and Amides:

A mixture of 1.3 mg NiCl<sub>2</sub> (0.01 mmol, 2 mol%), 68 mg ZnCl<sub>2</sub> (0.5 mmol, 1 equiv) and 82 mg ester **2a** (0.5 mmol) in 2mL DCM was stirred at 40 °C for 30 min. 268 mg CH<sub>2</sub>I<sub>2</sub> (1 mmol, 2 equiv.) was added followed by a slow addition of 1 ml solution of Et<sub>2</sub>Zn in hexane (1M, 1 mmol, 2 equiv.) over 20 min under nitrogen. After the addition, the reaction was stirred for a further 10 min before diluted with EtOAc and quenched with saturated aqueous NH<sub>4</sub>Cl solution. The organic layer was dried over anhydrous MgSO<sub>4</sub> and the solvent was removed in vacuo. The residual oil was dissolved in 1mL CHCl<sub>3</sub>, and was treated with a few drops of Br<sub>2</sub> for 10 min to

remove residual **2a** left. Purification by silica gel column chromatography afforded the pure product.

### Methyl 2-phenylcyclopropane-1-carboxylate<sup>9</sup>

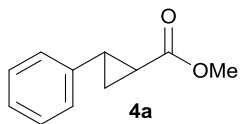

Purification by silica gel column chromatography (20-40% DCM/petroleum ether) afforded **4a** as a colourless oil (80 mg, 90%). <sup>1</sup>H NMR (400 MHz, CDCl<sub>3</sub>) δ 7.86 (d, *J* = 8.7 Hz, 2H), 7.60 (d, *J* = 8.7 Hz, 2H), 7.35 – 7.29 (m, 2H), 7.25 (d, *J* = 7.2 Hz, 1H), 7.20 – 7.16 (m, 2H), 2.86 – 2.80 (m, 1H), 2.71 (ddd, *J* = 9.1, 6.6, 4.0 Hz, 1H), 1.96 – 1.90 (m, 1H), 1.61 – 1.55 (m, 1H). <sup>13</sup>C NMR (100 MHz, CDCl<sub>3</sub>) δ 197.4, 140.2, 136.5, 131.9, 129.6 (2C), 128.6 (2C), 128.1 (2C), 126.7, 126.2 (2C), 30.2, 29.2, 19.3.

### Ethyl 2-(4-fluorophenyl)cyclopropane-1-carboxylate<sup>10</sup>

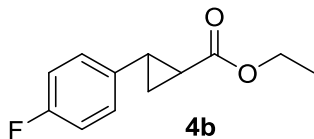

A similar procedure was used for 97 mg **3b** (0.5 mmol), 1.3 mg NiCl<sub>2</sub> (0.01 mmol, 2 mol%), 68 mg ZnCl<sub>2</sub> (0.5 mmol, 1 equiv), 268 mg CH<sub>2</sub>I<sub>2</sub> (1 mmol, 2 equiv.), 2 mL DCM at 40 °C and 1 mL solution Et<sub>2</sub>Zn in hexane (1 M, 1 mmol, 2 equiv., added over 20 min). Purification by silica gel column chromatography (0-10% Et<sub>2</sub>O/petroleum ether) afforded **4b** as a colourless oil (79 mg, 76%). <sup>1</sup>H NMR (400 MHz, CDCl<sub>3</sub>) δ 7.07 (dd, *J* = 8.6, 5.3 Hz, 2H), 6.97 (t, *J* = 8.7 Hz, 1H), 4.17 (q, *J* = 7.1 Hz, 2H), 2.50 (ddd, *J* = 9.4, 6.5, 4.2 Hz, 1H), 1.84 (ddd, *J* = 8.5, 5.3, 4.2 Hz, 1H), 1.61 – 1.55 (m, 1H), 1.28 (t, *J* = 7.1 Hz, 3H), 1.27 – 1.23 (m, 1H, overlapped). <sup>13</sup>C NMR (100 MHz, CDCl<sub>3</sub>) δ 173.2, 161.6 (d, *J* = 244.8 Hz), 135.7 (d, *J* = 3.2 Hz), 127.8 (d, *J* = 8.0 Hz, 2C), 115.2 (d, *J* = 21.5 Hz, 2C), 60.7, 25.4, 23.9, 16.8, 14.2.

### Ethyl 2-(4-methoxyphenyl)cyclopropane-1-carboxylate<sup>11</sup>



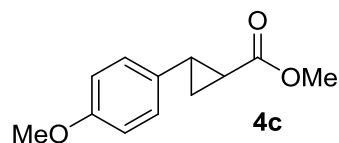

A similar procedure was used for 96 mg **3c** (0.5 mmol), 1.3 mg NiCl<sub>2</sub> (0.01 mmol, 2 mol%), 68 mg ZnCl<sub>2</sub> (0.5 mmol, 1 equiv), 268 mg CH<sub>2</sub>I<sub>2</sub> (1 mmol, 2 equiv.), 2 mL DCM at 40 °C and 1 mL solution Et<sub>2</sub>Zn in hexane (1 M, 1 mmol, 2 equiv., added over 20 min). Purification by silica gel column chromatography (0-10% Et<sub>2</sub>O/petroleum ether) afforded **4c** as a white solid (61 mg, 59%). <sup>1</sup>H NMR (400 MHz, CDCl<sub>3</sub>) δ 7.03 (d, *J* = 8.3 Hz, 2H), 6.83 (d, *J* = 8.3 Hz, 2H), 3.78 (s, 3H), 3.71 (s, 3H), 2.49 (ddd, *J* = 9.2, 6.5, 4.1 Hz, 1H), 1.83 (ddd, *J* = 8.3, 5.2, 4.1 Hz, 1H), 1.58 – 1.53 (m, 1H), 1.26 (ddd, *J* = 8.3, 6.5, 4.1 Hz, 1H). <sup>13</sup>C NMR (100 MHz, CDCl<sub>3</sub>) δ 174.0, 158.4, 131.9, 127.4, 113.9, 55.3, 51.8, 25.7, 23.6, 16.6.

### Benzyl 2-phenylcyclopropane-1-carboxylate<sup>12</sup>

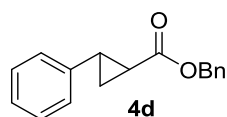

A similar procedure was used for 119 mg **3d** (0.5 mmol), 1.3 mg NiCl<sub>2</sub> (0.01 mmol, 2 mol%), 68 mg ZnCl<sub>2</sub> (0.5 mmol, 1 equiv), 268 mg CH<sub>2</sub>I<sub>2</sub> (1 mmol, 2 equiv.), 2 mL DCM at 40 °C and 1 mL solution Et<sub>2</sub>Zn in hexane (1 M, 1 mmol, 2 equiv., added over 20 min). Purification by silica gel column chromatography (0-10% Et<sub>2</sub>O/petroleum ether) afforded **4d** as a colourless gum (104 mg, 82%). <sup>1</sup>H NMR (400 MHz, CDCl<sub>3</sub>) δ 7.30 – 7.14 (m, 7H), 7.10 (d, *J* = 7.3 Hz, 1H), 7.02 – 6.97 (m, 2H), 5.07 (d, *J* = 12.4 Hz, 1H, Germinal coupling), 5.04 (d, *J* = 12.4 Hz, 1H, Germinal coupling), 2.49 – 2.43 (m, 1H), 1.89 – 1.84 (m, 0H), 1.56 – 1.50 (m, 1H), 1.26 – 1.20 (m, 1H). <sup>13</sup>C NMR (100 MHz, CDCl<sub>3</sub>) δ 173.2, 139.9, 136.0, 128.6 (2C), 128.5 (2C), 128.2 (2C), 126.5 (2C), 126.2 (2C), 66.6, 26.4, 24.1, 17.2.

### Benzyl 2-methylcyclopropane-1-carboxylate<sup>13</sup>

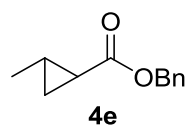

A similar procedure was used for 86 mg **3e** (0.5 mmol), 1.3 mg NiCl<sub>2</sub> (0.01 mmol, 2 mol%), 68 mg ZnCl<sub>2</sub> (0.5 mmol, 1 equiv), 268 mg CH<sub>2</sub>I<sub>2</sub> (1 mmol, 2 equiv.), 2 mL DCE at 70 °C and 1 mL

solution  $\text{Et}_2\text{Zn}$  in hexane (1 M, 1 mmol, 2 equiv., added over 20 min). Purification by silica gel column chromatography (0-10%  $\text{Et}_2\text{O}$ /petroleum ether) afforded **4e** as a colourless oil (34 mg, 37%).  $^1\text{H}$  NMR (400 MHz,  $\text{CDCl}_3$ )  $\delta$  7.40 – 7.29 (m, 5H), 5.11 (s, 2H), 1.47 – 1.36 (m, 2H), 1.24 – 1.18 (m, 1H), 1.11 (d,  $J = 5.9$  Hz, 3H), 0.73 – 0.66 (m, 1H).  $^{13}\text{C}$  NMR (100 MHz,  $\text{CDCl}_3$ )  $\delta$  174.3, 136.2, 128.5 (2C), 128.13 (2C), 128.10, 66.2, 21.3, 17.8, 17.4, 16.9.

### 2-Ethylhexyl cyclopropanecarboxylate

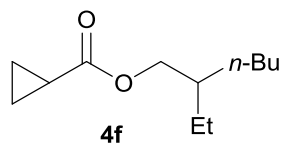

A similar procedure was used for 92 mg **3f** (0.5 mmol), 1.3 mg  $\text{NiCl}_2$  (0.01 mmol, 2 mol%), 68 mg  $\text{ZnCl}_2$  (0.5 mmol, 1 equiv.), 268 mg  $\text{CH}_2\text{I}_2$  (1 mmol, 2 equiv.), 2 mL DCM at 40 °C and 1 mL solution  $\text{Et}_2\text{Zn}$  in hexane (1 M, 1 mmol, 2 equiv., added over 20 min). Purification by silica gel column chromatography (2%  $\text{Et}_2\text{O}$ /petroleum ether) afforded **4f** as a colourless oil (81 mg, 82%).  $^1\text{H}$  NMR (400 MHz,  $\text{CDCl}_3$ )  $\delta$  3.99 (d,  $J = 2.2$  Hz, 1H), 3.98 (d,  $J = 2.2$  Hz, 1H), 1.55 (s, 2H), 1.41 – 1.24 (m, 10H), 1.02 – 0.96 (m, 2H), 0.93 – 0.80 (m, 8H).  $^{13}\text{C}$  NMR (100 MHz,  $\text{CDCl}_3$ )  $\delta$  175.0, 66.9, 38.8, 30.4, 28.9, 23.8, 22.9, 14.0, 12.9, 11.0, 8.2 (2C). IR (neat,  $\text{cm}^{-1}$ ) 2962 (m), 2933 (m), 2865 (w), 1732 (s), 1461 (w), 1402 (m), 1175 (s), 1073 (m), 1030 (w), 917 (w), 824 (w). HRMS (ESI-TOF)  $m/z$ : calc. for  $\text{C}_{12}\text{H}_{22}\text{O}_2\text{Na}$   $[\text{M}+\text{Na}]^+$ : 222.1512, found 221.1507.

### (S)-3,7-Dimethyloct-6-en-1-yl cyclopropanecarboxylate

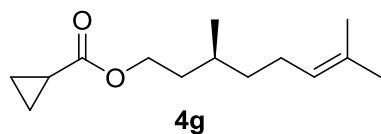

A mixture of 6.5 mg  $\text{NiCl}_2$  (0.05 mmol, 20 mol%), 34 mg  $\text{ZnCl}_2$  (0.25 mmol, 1 equiv.) and 53 mg of (S)-3,7-dimethyloct-6-en-1-yl acrylate (0.25 mmol) in 1 mL DCM was stirred at 40 °C for 10 min. 70 mg  $\text{CH}_2\text{I}_2$  (0.26 mmol, 1.05 equiv.) was added followed by a slow addition of a solution of  $\text{Et}_2\text{Zn}$  (1M, 0.27 mL, 1.1 equiv.) in hexane over 40 min. After the addition, the reaction was stirred for a further 10 min before diluted with EtOAc and quenched with saturated aqueous  $\text{NH}_4\text{Cl}$  solution. Purification by silica gel column chromatography (0-3%  $\text{Et}_2\text{O}$ /petroleum ether) afforded **4g** as a colourless oil (38 mg, 68%).  $^1\text{H}$  NMR (400 MHz,  $\text{CDCl}_3$ )

$\delta$  5.09 (d,  $J = 7.3$  Hz, 1H), 4.17 – 4.05 (m, 2H), 2.07 – 1.89 (m, 2H), 1.68 (s, 3H), 1.61 (s, 3H), 1.71 – 1.51 (m, 2H, overlapped), 1.49 – 1.30 (m, 2H), 1.26 – 1.11 (m, 2H), 1.02 – 0.95 (m, 2H), 0.92 (d,  $J = 6.6$  Hz, 3H), 0.88 – 0.80 (m, 2H).  $^{13}\text{C}$  NMR (100 MHz,  $\text{CDCl}_3$ )  $\delta$  174.9, 131.3, 124.6, 63.0, 37.0, 35.5, 29.5, 25.7, 25.4, 19.4, 17.6, 12.9, 8.2 (2C). IR (neat,  $\text{cm}^{-1}$ ) 2960 (w), 2920 (w), 1729 (s), 1456 (w), 1404 (m), 1374 (m), 1173 (s), 1075 (w), 903 (w), 825 (w). HRMS (ESI-TOF)  $m/z$ : calc. for  $\text{C}_{14}\text{H}_{25}\text{O}_2$   $[\text{M}+\text{H}]^+$ : 225.1849, found 225.1844.

### 2-Phenyl-*N*-((*S*)-1-phenylethyl)cyclopropane-1-carboxamide<sup>14</sup>

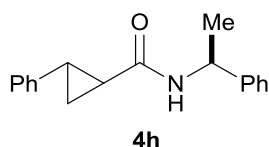

A similar procedure was used for 3.3 mg  $\text{NiCl}_2$  (0.025 mmol, 10 mol%), 134 mg  $\text{CH}_2\text{I}_2$  (0.5 mmol, 2 equiv), 63 mg **3h** (0.25 mmol) in 1 mL DCE at 70 °C and 0.5 mL solution  $\text{Et}_2\text{Zn}$  in hexane (1 M, 0.5 mmol, 2 equiv, added over 30 min). Purification by silica gel column chromatography (0-25% EtOAc/petroleum ether) afforded **4h** as a white solid (40 mg, 60%).  $^1\text{H}$  NMR (400 MHz,  $\text{CDCl}_3$ )  $\delta$  7.39 – 7.03 (m, 10H), 5.81 (d,  $J = 7.2$  Hz, 1H, NH), 5.22 – 5.12 (m, 1H), 1.67 – 1.55 (m, 2H), 1.50 (d,  $J = 6.9$  Hz, 3H), 1.28 – 1.18 (m, 1H).  $^{13}\text{C}$  NMR (100 MHz,  $\text{CDCl}_3$ ): mixture of two diastereomers,  $\delta$  170.8 (2C), 143.3, 143.2, 140.9 (2C), 128.7 (3C), 128.4 (3C), 128.4 (2C), 127.4 (2C), 126.2 (6C), 126.0 (4C), 49.2 (2C), 26.9, 26.8, 25.0 (2C), 21.9, 21.8, 16.1, 16.0.

### *N*-benzyl-2-methylcyclopropane-1-carboxamide<sup>15</sup>

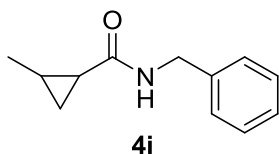

A similar procedure was used for 3.3 mg  $\text{NiCl}_2$  (0.1 mmol, 10 mol%), 134 mg  $\text{CH}_2\text{I}_2$  (0.5 mmol, 2 equiv), 44 mg **3i** (0.25 mmol) in 1 mL DCE at 70 °C and 0.5 mL solution  $\text{Et}_2\text{Zn}$  in hexane (1 M, 0.5 mmol, 2 equiv, added over 30 min). Purification by silica gel column chromatography (0-25% EtOAc/petroleum ether) afforded **4i** as a colourless gum (17 mg, 36%).  $^1\text{H}$  NMR (400 MHz,  $\text{CDCl}_3$ )  $\delta$  7.38 – 7.24 (m, 5H), 5.80 (br s, 1H, NH), 4.45 (d,  $J = 2.2$  Hz, 1H), 4.44 (d,  $J = 2.2$  Hz,

1H), 1.46 – 1.35 (m, 1H), 1.23 – 1.15 (m, 1H), 1.09 (d,  $J = 6.0$  Hz, 3H), 1.08 – 1.02 (m, 1H), 0.61 – 0.54 (m, 1H).  $^{13}\text{C}$  NMR (100 MHz,  $\text{CDCl}_3$ )  $\delta$  173.1, 138.5, 128.7 (2C), 127.9 (2C), 127.5, 43.9, 23.6, 17.9, 15.7, 15.7.

### ***N,N*-diethyl-2-phenylcyclopropane-1-carboxamide<sup>16</sup>**

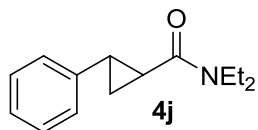

A similar procedure was used for 3.3 mg  $\text{NiCl}_2$  (0.1 mmol, 10 mol%), 134 mg  $\text{CH}_2\text{I}_2$  (0.5 mmol, 2 equiv), 51 mg **3j** (0.25 mmol) in 1 mL DCE at 70 °C and 0.5 mL solution  $\text{Et}_2\text{Zn}$  in hexane (1 M, 0.5 mmol, 2 equiv, added over 30 min). Purification by silica gel column chromatography (0-30%  $\text{Et}_2\text{O}$  /petroleum ether) afforded **4j** as a colourless gum (39 mg, 72%).  $^1\text{H}$  NMR (400 MHz,  $\text{CDCl}_3$ )  $\delta$  7.30 – 7.25 (m, 2H), 7.22 – 7.16 (m, 1H), 7.13 (dd,  $J = 8.7, 0.7$  Hz, 2H), 3.43 (q,  $J = 7.1$  Hz, 4H), 2.51 – 2.45 (m, 1H), 1.96 – 1.90 (m, 1H), 1.68 – 1.62 (m, 1H), 1.27 – 1.22 (m, 1H), 1.16 (br s, 6H).  $^{13}\text{C}$  NMR (100 MHz,  $\text{CDCl}_3$ )  $\delta$  171.0, 141.2, 128.4 (2C), 126.1 (3C), 42.1, 41.0, 25.5, 23.2, 16.2, 14.9, 13.3.

### **$\text{Ni}(\text{COD})_2$ -Catalyzed Cyclopropanation of chalcone **1a** with $\text{Zn}(\text{CH}_2\text{I})_2$ <sup>17</sup> (Scheme 3b):**

To a solution of  $\text{Et}_2\text{Zn}$  (0.5 mmol) in DCM (1ml) at -78 °C was added 268 mg  $\text{CH}_2\text{I}_2$  (1.0 mmol) dropwise. The mixture was stirred at -15 °C for 30 min followed by addition of **1a** (52mg, 0.25 mmol) and  $\text{Ni}(\text{COD})_2$  (13.5 mg, 0.049 mmol, 20 mol%). The reaction mixture was stirred at 0 °C for 1h. GC analysis using dodecane as an internal standard indicated the formation of **2a** in 79% yield with 2% of **1a** remaining.

### **$\text{Ni}(\text{COD})_2$ -Catalyzed Cyclopropanation of chalcone **1a** with $\text{EtZnCH}_2\text{I}$ <sup>18</sup> (Scheme 3b):**

To a solution of  $\text{Et}_2\text{Zn}$  (0.5 mmol) in DCM (1ml) at -78 °C was added 134 mg  $\text{CH}_2\text{I}_2$  (0.5 mmol) dropwise. The mixture was stirred at 0 °C for 5 min followed by addition of **1a** (52mg, 0.25 mmol) and  $\text{Ni}(\text{COD})_2$  (13.5 mg, 0.049 mmol, 20 mol%). The reaction mixture was stirred at 0 °C for 1h. GC analysis using dodecane as an internal standard indicated the formation of **2a** in 8% yield with 64% of **1a** remaining.

### Ni(COD)<sub>2</sub>-Catalyzed Cyclopropanation of chalcone **1a** with IZnCH<sub>2</sub>I<sup>18</sup> (Scheme 3b):

To a solution of I<sub>2</sub> (0.5 mmol) in DCM (1 ml) at 0 °C was added 0.5 mL solution of Et<sub>2</sub>Zn in hexane (1 M, 0.5 mmol). After stirring for 5 min, 134 mg CH<sub>2</sub>I<sub>2</sub> (0.5 mmol) was added dropwise. The mixture was stirred at 0 °C for 5 min followed by addition of **1a** (52mg, 0.25 mmol) and Ni(COD)<sub>2</sub> (13.5 mg, 0.049 mmol, 20 mol%). The reaction mixture was stirred at 0 °C for 1h. GC analysis using dodecane as an internal standard indicated the formation of **2a** in 59% yield with 36% of **1a** remaining.

## References

1. (a) R. Infante, J. Nieto and C. Andres, *Org. Biomol. Chem.*, 2014, **12**, 345 – 354. (b) X. Wang and Z. D. Wang, *Tetrahedron*, 2011, **67**, 3406 – 3411.
2. I. Nicolas, P. Le Maux and G. Simonneaux, *Tetrahedron Lett.*, 2008, **49**, 2111-2113.
3. D. D. Tanner, J. J. Chen, C. Luelo and P. M. Peters, *J. Am. Chem. Soc.*, 1992, **114**, 713-717.
4. H. Kakei, T. Sone, Y. Sohtome, S. Matsunaga and M. Shibasaki, *J. Am. Chem. Soc.*, 2007, **129**, 13410-13411.
5. G. Velegraki and M. Stratakis, *J. Org. Chem.*, 2013, **78**, 8880-8884.
6. C. Clarke, S. Foussat, D. J. Fox, D. S. Pedersen and S. Warren, *Org. Biomol. Chem.*, 2009, **7**, 1323 – 1328.
7. (a) S. K. Hanson, R. Wu and L. A. P. Silks, *Org. Lett.*, 2011, **13**, 1908–1911. (b) P. Wallace and S. Warren, *J. Chem. Soc., Perkin Trans. 1. Org. Bioorg. Chem.*, 1988, 2971-2978.
8. K. Fujii, T. Misaki and T. Sugimura, *Chem. Lett.*, 2014, 43, 634.
9. M. Davi and H. Lebel, *Chem. Commun.*, 2008, **40**, 4974 – 4976.
10. A. Kozikowski, T. Kurome, V. Setola, B. Roth, 2007, WO2007/25144 A1.
11. M. Bordeaux, V. Tyagi and R. Fasan, *Angew. Chem., Int. Ed.*, 2015, **54**, 1744-1748.
12. M. P. A. Lyle and P. D. Wilson, *Org. Lett.*, 2004, **6**, 855-857.
13. R. T. Backer, M. J. Fisher, S. L. Kuklish, S. P. Hollinshead, E. C. R. Simth and K. Takeuchi, Eli Lilly and Company, WO2008/103185 A2, 2008.
14. X. Zhang, K. Hodgetts, S. Rachwal, H. Zhao, J. W. F. Wasley, K. Craven, R. Brodbeck, A. Kieltyka, D. Hoffman, M. D. Bacolod, B. Girard, J. Tran and A. Thurkauf, *J. Med. Chem.*, 2000, **43**, 3923–3932.
15. M. G. Stanton, S. R. Stauffer, A. R. Gregro, M. Steinbeiser, P. Nantermet, S. Sankaranarayanan, E. A. Price, G. Wu, M.-C. Crouthamel, J. Ellis, M.-T. Lai, A. S. Espeseth, X.-P. Shi, L. Jin, D. Colussi, B. Pietrak, Q. Huang, M. Xu, A. J. Simon, S. L. Graham, J. P. Vacca and H. Selnick, *J. Med. Chem.*, 2007, **50**, 3431–3433.
16. J. M. Concellon, M. Huerta, E. Bardales, *Tetrahedron*, 2004, **60**, 10059 – 10065.
17. A. B. Charette, C. Molinaro, C. Brochu, *J. Am. Chem. Soc.*, 2001, **123**, 12168.
18. S. E. Denmark, S. P. Oconnor, *J. Org. Chem.*, 1997, **62**, 3390.
